# Supplementary material
Source: publisher site journal article supplement (https://www.dovepress.com/article/429147)
Supplement: Supplementary file 1 [file get_supplementary_file.php]

**Annex I**

**Consent form**

Debre Markos University

College of Medicine and Health Sciences

Department of Environmental Health

Survey questionnaire to assess the prevalence of self-reported work-related musculoskeletal problems and associated risk factors among three-wheel car drivers in Ethiopia.

My name is --------------------------. I am working in the research team of Debre Markos University College of Health Sciences Department of Environmental Health. I would like to ask you a few questions about musculoskeletal problem and associated risk factors. This will help us to improve occupational safety, health and working environment that will cause a deleterious effect on you. Your name will not be written in this form and will never be used in connection with any information you tell us. All information given by you will be kept strictly confidential. Your participation is voluntary and you are not obliged to answer any question you do not wish to answer. If you fill discomfort with the interview, please fill free to drop it at any time. This interview will take about 30 minutes. Do I have your permission to continue?

1. If yes, continue to the next page

2. If no, skip to the next participant by writing reasons for his/ her refusal

Name and signature of the interviewer who sought the consent_________________

Date of interview ______/ ________ /________

Date/ Month /Year

Result of interview: 1. Completed 2. Respondent not available 3. Refused 4. Partially completed

Checked by Supervisor: Name ____________Sig._________ Date_________

**English version information sheet**

**Name of the investigator:** Getasew Yirdaw, Balew Adane

**Name of organization:** Debre Markos University, College of Health sciences

**Title of the study:** Self-reported work-related musculoskeletal problems and associated risk factors among three-wheel car drivers in Ethiopia: a cross-sectional community-based study, 2022. **Objective of the study:** Assessment of the prevalence of musculoskeletal problems and associated risk factors among three-wheel car drivers in Ethiopia: a cross-sectional community-based study, 2022.

**Introduction:** This information sheet and consent form is prepared to explain the study you are being asked to join. Please listen carefully and ask any questions about the study before you are agreeing to join. You may ask questions at any time after joining the study.

**Procedure:** To assess musculoskeletal problems and associated risk factors among three-wheel car drivers, we invite you to take part in this study. If you are willing to participate in this study, you need to understand and sign the agreement form. Then after, you will be interviewed by the data collector to give your response. You do not need to tell your name to the data collector and all your response will be kept confidentially by using coding system whereby no one will have access to your response.

**Risk of the study:** The study has no any risk for the participant and interview also will be private to make safe participants from management related problems.

**Benefit of the study:** The study participants will not get direct benefit for being participated. The result will be used as a baseline for further studies that can be done in these areas. The result will be presented to Ministry of Transport, Amhara National Regional State Transport office, and East Gojjam Transport office for designing and implement occupational safety and health enhancing program at work place.

**Confidentiality:** The information collected from this study will be kept confidential and information about you that will be collected by this study will be stored in a file, without your name, but a code number assigned to it and it will not be revealed to anyone except the principal investigators.

**Right to refuse or withdraw:** you have full right to refuse from participating in this research. You can choose not to respond to some or all questions. You have also the full right to withdraw from this study at any time you wish.

**Persons to contact:**

1. Getasew Yirdaw

E-mail: [gech23man@gmail.com](mailto:gech23man@gmail.com)

2. Balew Adane

E-mail: [adanebalew@gmail.com](mailto:adanebalew@gmail.com)

**Questionnaire Identification number ……………………………………..**

**Part-I Socio-economic status of the respondents**

| **Code** | **Questions** | **Choice** | **Skip to** |
| --- | --- | --- | --- |
| 101 | Sex | 1. Male 2. Female |  |
| 102 | Age of respondent (year) | ………………….. years |  |
| 103 | Marital status | 1. Single 2. Married 3. Divorced 4. Widowed |  |
| 104 | Religion | 1. Orthodox 2. Muslim 3. Protestant 4. Others |  |
| 105 | Educational level | 1. Primary school 2. Secondary school 3. College and above |  |
| 106 | Ethnicity | 1. Amhara 2. Oromo 3. Agew 4. Tigre |  |
| 107 | Ownership status | 1. Owner 2. Employee |  |
| 108 | Average monthly income | 1. <1500 ETB 2. 1500 – 3000 ETB 3. 3001 – 6000 ETB 4. >6000 ETB |  |
| 109 | Site of service | 1. Within town 2. Neighboring rural kebeles |  |

**Part-II Personal (lifestyle) factors associated with the musculoskeletal disorders.**

| 110 | Habit of doing physical exercise | 1. Yes 2. No | If “No” skip to Q.no 112. |
| --- | --- | --- | --- |
| 111 | If Q.no 110 is yes. How many times you are doing physical exercise (non-work) per week. | 1. None 2. Once per week 3. Two times per week 4. Three times per week 5. Every day |  |
| 112 | Smoking status | 1. Never 2. Past/former smoker 3. Current smoker |  |
| 113 | Alcohol consumption | 1. Yes 2. No |  |

**Part – III Ergonomic and work-related conditions of the respondents.**

| 114 | Comfort seat | 1. Yes 2. No |  |
| --- | --- | --- | --- |
| 115 | Comfortable sitting posture | 1. Yes 2. No |  |
| 116 | Comfortable back support | 1. Yes 2. No |  |
| 117 | Comfortable steering wheel | 1. Yes 2. No |  |
| 118 | Hold extra passengers | 1. Yes 2. No |  |
| 119 | How long you drive per week | 1. None 2. 1-2 times/week 3. 3 times/week 4. 4-5 times/week 5. ≥6 times/week |  |
| 120 | How many hours do you drive continuously without taking a break per day | ……………………… hrs. |  |
| 121 | For how long do you take a break | ………………… minutes |  |

**Part – IV Anthropometric measurement of the respondents.**

| 122 | Height | ………….. kgs. |  |
| --- | --- | --- | --- |
| 123 | Weight | …………... meter |  |
| 124 | Body Mass Index (calculated by the data collector) | 1. Under weight (< 18.5 kg/m2) 2. Healthy (18.5 – 24.9 kg/m2) 3. Overweight (25 – 29.9kg/m2) 4. Obese (≥30 kg/m2) |  |

**Part – V Musculoskeletal symptom: choice one possible answer and circle it.**

| 125 | Have you at any time during the last 12 months had trouble ache, pain, and discomfort on your back? | 1. Yes 2. No | If “No” skip to Q.no 128. |
| --- | --- | --- | --- |
| 126 | What is the total length of time that you have had back trouble during the last 12 months? | 1. 0 days  2. 1-7 days  3. 8-30 days  4. >30 days, but not every day  5. Every day |  |
| 127 | What is the total length of time that back trouble has prevented you from doing your normal work during the last 12 months? | 1. 0 days  2. 1-7 days  3. 8-30 days  4. >30 days |  |
| 128 | Have you at any time during the last 12 months had trouble ache, pain, and discomfort on your neck? | 1. Yes 2. No | If “No” skip to Q.no 131. |
| 129 | What is the total length of time that you have had neck trouble during the last 12 months? | 1. 0 days  2. 1-7 days  3. 8-30 days  4. >30 days, but not every day  5. Every day |  |
| 130 | What is the total length of time that neck trouble has prevented you from doing your normal work during the last 12 months? | 1. 0 days  2. 1-7 days  3. 8-30 days  4. >30 days |  |
| 131 | Have you at any time during the last 12 months had trouble ache, pain, and discomfort on your Shoulder? | 1. Yes 2. No | If “No” skip to Q.no 134. |
| 132 | What is the total length of time that you have had shoulder trouble during the last 12 months? | 1. 0 days  2. 1-7 days  3. 8-30 days  4. >30 days, but not every day  5. Every day |  |
| 133 | What is the total length of time that shoulder trouble has prevented you from doing your normal work during the last 12 months? | 1. 0 days  2. 1-7 days  3. 8-30 days  4. >30 days |  |
| 134 | Have you at any time during the last 12 months had trouble ache, pain, and discomfort on your Elbow/Forearm? | 1. Yes 2. No | If “No” skip to Q.no 137. |
| 135 | What is the total length of time that you have had elbow/forearm trouble during the last 12 months? | 1. 0 days  2. 1-7 days  3. 8-30 days  4. >30 days, but not every day  5. Every day |  |
| 136 | What is the total length of time that elbow/forearm trouble has prevented you from doing your normal work during the last 12 months? | 1. 0 days  2. 1-7 days  3. 8-30 days  4. >30 days |  |
| 137 | Have you at any time during the last 12 months had trouble ache, pain, and discomfort on your hand/Wrist? | 1. Yes 2. No | If “No” skip to Q.no 140 |
| 138 | What is the total length of time that you have had hand/wrist trouble during the last 12 months? | 1. 0 days  2. 1-7 days  3. 8-30 days  4. >30 days, but not every day  5. Every day |  |
| 139 | What is the total length of time that hand/wrist trouble has prevented you from doing your normal work during the last 12 months? | 1. 0 days  2. 1-7 days  3. 8-30 days  4. >30 days |  |
| 140 | Have you at any time during the last 12 months had trouble ache, pain, and discomfort on your hips/thighs? | 1. Yes 2. No | If “No” skip to Q.no 143 |
| 141 | What is the total length of time that you have had hips/thighs trouble during the last 12 months? | 1. 0 days  2. 1-7 days  3. 8-30 days  4. >30 days, but not every day  5. Every day |  |
| 142 | What is the total length of time that hips/thighs trouble has prevented you from doing your normal work during the last 12 months? | 1. 0 days  2. 1-7 days  3. 8-30 days  4. >30 days |  |
| 143 | Have you at any time during the last 12 months had trouble ache, pain, and discomfort on your knees? | 1. Yes 2. No | If “No” skip to Q.no 146 |
| 144 | What is the total length of time that you have had knees trouble during the last 12 months? | 1. 0 days  2. 1-7 days  3. 8-30 days  4. >30 days, but not every day  5. Every day |  |
| 145 | What is the total length of time that knees trouble has prevented you from doing your normal work during the last 12 months? | 1. 0 days  2. 1-7 days  3. 8-30 days  4. >30 days |  |
| 146 | Have you at any time during the last 12 months had trouble ache, pain, and discomfort on your ankles/feet? | 1. Yes 2. No |  |
| 147 | What is the total length of time that you have had ankles/feet trouble during the last 12 months? | 1. 0 days  2. 1-7 days  3. 8-30 days  4. >30 days, but not every day  5. Every day |  |
| 148 | What is the total length of time that ankles/feet trouble has prevented you from doing your normal work during the last 12 months? | 1. 0 days  2. 1-7 days  3. 8-30 days  4. >30 days |  |
